# Supplementary material for: Upper Limb Motor Planning in Individuals with Cerebral Palsy Aged between 3 and 21 Years Old: A Systematic Review
Source: MDPI journal article supplement (doi:10.3390/brainsci11070920), 2021-07-12
Supplement: s1 [file s1]

**Table S1.** Search strategy for each database.

**PubMed (MEDLINE)**

|                                                                                                                                                                                                                                                                                                                                                                                                                                                                                                                                                                                                                                                                                                                                                                                                                                                                                                                     |            |
|---------------------------------------------------------------------------------------------------------------------------------------------------------------------------------------------------------------------------------------------------------------------------------------------------------------------------------------------------------------------------------------------------------------------------------------------------------------------------------------------------------------------------------------------------------------------------------------------------------------------------------------------------------------------------------------------------------------------------------------------------------------------------------------------------------------------------------------------------------------------------------------------------------------------|------------|
| "Cerebral Palsy"[Mesh] OR "Cerebral palsy" OR "little disease" OR "brain palsy" OR "brain paralysis" OR "central palsy" OR "central paralysis" OR "cerebral paralysis" OR "cerebral paresis" OR "encephalopathia infantilis" OR "spastic diplegia" OR preterm                                                                                                                                                                                                                                                                                                                                                                                                                                                                                                                                                                                                                                                       | 119,179    |
| ("Child"[Mesh] OR "Adolescent"[Mesh] OR "Child"[Mesh:NoExp] OR "Disabled Children"[Mesh] OR Child OR children OR adolescen* OR teen OR teens OR teenager* OR pediater* OR Infantile OR childhood) <b>AND</b> ("Cerebral Palsy"[Mesh] OR "Cerebral palsy" OR "little disease" OR "brain palsy" OR "brain paralysis" OR "central palsy" OR "central paralysis" OR "cerebral paralysis" OR "cerebral paresis" OR "encephalopathia infantilis" OR "spastic diplegia" OR preterm))                                                                                                                                                                                                                                                                                                                                                                                                                                       | 66,251     |
| ((("Cerebral Palsy"[Mesh] OR "Cerebral palsy" OR "little disease" OR "brain palsy" OR "brain paralysis" OR "central palsy" OR "central paralysis" OR "cerebral paralysis" OR "cerebral paresis" OR "encephalopathia infantilis" OR "spastic diplegia" OR preterm)) <b>AND</b> ("Child"[Mesh] OR "Adolescent"[Mesh] OR "Child"[Mesh:NoExp] OR "Disabled Children"[Mesh] OR Child OR children OR adolescen* OR teen OR teens OR teenager* OR pediater* OR Infantile OR childhood)) <b>AND</b> ("Upper Extremity"[Mesh] OR "Hand Strength"[Mesh] OR Grip OR Grips OR Grasp OR Grasps OR Manipulation OR Fingertip OR Prehension OR "pinch strength" OR Finger* OR arm OR arms OR shoulder OR forearm OR elbow OR axilla OR hand OR wrist OR metacarpus OR "Upper Extremity" OR "upper limb" OR pointing)                                                                                                               | 6,295      |
| ((("Cerebral Palsy"[Mesh] OR "Cerebral palsy" OR "little disease" OR "brain palsy" OR "brain paralysis" OR "central palsy" OR "central paralysis" OR "cerebral paralysis" OR "cerebral paresis" OR "encephalopathia infantilis" OR "spastic diplegia" OR preterm)) <b>AND</b> ("Child"[Mesh] OR "Adolescent"[Mesh] OR "Child"[Mesh:NoExp] OR "Disabled Children"[Mesh] OR Child OR children OR adolescen* OR teen OR teens OR teenager* OR pediater* OR Infantile OR childhood)) <b>AND</b> ("Upper Extremity"[Mesh] OR "Hand Strength"[Mesh] OR Grip OR Grips OR Grasp OR Grasps OR Manipulation OR Fingertip OR Prehension OR "pinch strength" OR Finger* OR arm OR arms OR shoulder OR forearm OR elbow OR axilla OR hand OR wrist OR metacarpus OR "Upper Extremity" OR "upper limb" OR pointing)) <b>AND</b> (planning OR anticipat* OR modulation OR "predictive control" OR preparatory OR "motor program*") | <b>351</b> |

**CINHAL**

|                                                                                                                                                                                                                                                                                                                                                                                                                                                                                                                                                                                                                                                                                                                                                                                                                                                                                                                     |        |
|---------------------------------------------------------------------------------------------------------------------------------------------------------------------------------------------------------------------------------------------------------------------------------------------------------------------------------------------------------------------------------------------------------------------------------------------------------------------------------------------------------------------------------------------------------------------------------------------------------------------------------------------------------------------------------------------------------------------------------------------------------------------------------------------------------------------------------------------------------------------------------------------------------------------|--------|
| ( "Cerebral palsy" OR "little disease" OR "brain palsy" OR "brain paralysis" OR "central palsy" OR "central paralysis" OR "cerebral paralysis" OR "cerebral paresis" OR "encephalopathia infantilis" OR "spastic diplegia" OR preterm) OR (MH "Cerebral Palsy")                                                                                                                                                                                                                                                                                                                                                                                                                                                                                                                                                                                                                                                     | 41,600 |
| ( ( "Cerebral palsy" OR "little disease" OR "brain palsy" OR "brain paralysis" OR "central palsy" OR "central paralysis" OR "cerebral paralysis" OR "cerebral paresis" OR "encephalopathia infantilis" OR "spastic diplegia" OR preterm ) OR (MH "Cerebral Palsy") ) <b>AND</b> ( ( Child OR children OR adolescen* OR teen OR teens OR teenager* OR pediater* OR Infantile OR childhood ) OR ( (MH "Child") OR (MH "Child, Disabled") ) ) )                                                                                                                                                                                                                                                                                                                                                                                                                                                                        | 19,764 |
| ( ( "Cerebral palsy" OR "little disease" OR "brain palsy" OR "brain paralysis" OR "central palsy" OR "central paralysis" OR "cerebral paralysis" OR "cerebral paresis" OR "encephalopathia infantilis" OR "spastic diplegia" OR preterm ) OR (MH "Cerebral Palsy") ) <b>AND</b> ( ( Child OR children OR adolescen* OR teen OR teens OR teenager* OR pediater* OR Infantile OR childhood ) OR ( (MH "Child") OR (MH "Child, Disabled") ) ) ) <b>AND</b> ( ( (MH "Upper Extremity") OR (MH "Hand Strength") OR (MH "Pinch Strength") ) OR ( Grip OR Grips OR Grasp OR Grasps OR Manipulation OR Fingertip OR Prehension OR "pinch strength" OR Finger* OR arm OR arms OR shoulder OR forearm OR elbow OR axilla OR hand OR wrist OR metacarpus OR "Upper Extremit*" OR "upper limb*" OR pointing ) ) )                                                                                                               | 1,595  |
| ( ( "Cerebral palsy" OR "little disease" OR "brain palsy" OR "brain paralysis" OR "central palsy" OR "central paralysis" OR "cerebral paralysis" OR "cerebral paresis" OR "encephalopathia infantilis" OR "spastic diplegia" OR preterm) OR (MH "Cerebral Palsy") ) <b>AND</b> ( ( Child OR children OR adolescen* OR teen OR teens OR teenager* OR pediater* OR Infantile OR childhood ) OR ( (MH "Child") OR (MH "Child, Disabled") ) ) ) <b>AND</b> ( ( (MH "Upper Extremity") OR (MH "Hand Strength") OR (MH "Pinch Strength") ) OR ( Grip OR Grips OR Grasp OR Grasps OR Manipulation OR Fingertip OR Prehension OR "pinch strength" OR Finger* OR arm OR arms OR shoulder OR forearm OR elbow OR axilla OR hand OR wrist OR metacarpus OR "Upper Extremit*" OR "upper limb*" OR pointing ) ) ) <b>AND</b> ( planning OR anticipat* OR modulation OR "predictive control" OR preparatory OR "motor program*" ) | 70     |

## Embase

|                                                                                                                                                                                                                                                                                                            |            |
|------------------------------------------------------------------------------------------------------------------------------------------------------------------------------------------------------------------------------------------------------------------------------------------------------------|------------|
| 'Cerebral palsy' OR 'little disease' OR 'brain palsy' OR 'brain paralysis' OR 'central palsy' OR 'central paralysis' OR 'cerebral paralysis' OR 'cerebral paresis' OR 'encephalopathia infantilis' OR 'spastic diplegia' OR preterm OR 'cerebral palsy'/exp OR 'little disease'/exp                        | 140<br>324 |
| 'Cerebral palsy' OR 'little disease' OR 'brain palsy' OR 'brain paralysis' OR 'central palsy' OR 'central paralysis' OR 'cerebral paralysis' OR 'cerebral paresis' OR 'encephalopathia infantilis' OR 'spastic diplegia' OR preterm OR 'cerebral palsy'/exp OR 'little disease'/exp <b>AND</b> 'child'/exp | 104<br>931 |

|                                                                                                                                                                                                                                                                                                                                                                                                                                                                                                                                                                                                                                                                                                                                                                                                                                                                                                                                            |          |
|--------------------------------------------------------------------------------------------------------------------------------------------------------------------------------------------------------------------------------------------------------------------------------------------------------------------------------------------------------------------------------------------------------------------------------------------------------------------------------------------------------------------------------------------------------------------------------------------------------------------------------------------------------------------------------------------------------------------------------------------------------------------------------------------------------------------------------------------------------------------------------------------------------------------------------------------|----------|
| OR 'adolescent'/exp OR 'brain damaged child'/exp OR Child OR children OR adolescen* OR teen OR teens OR teenager* OR pediatr* OR Infantile                                                                                                                                                                                                                                                                                                                                                                                                                                                                                                                                                                                                                                                                                                                                                                                                 |          |
| 'Cerebral palsy' OR 'little disease' OR 'brain palsy' OR 'brain paralysis' OR 'central palsy' OR 'central paralysis' OR 'cerebral paralysis' OR 'cerebral paresis' OR 'encephalopathia infantilis' OR 'spastic diplegia' OR preterm OR 'cerebral palsy'/exp OR 'little disease'/exp <b>AND</b> 'child'/exp OR 'adolescent'/exp OR 'brain damaged child'/exp OR Child OR children OR adolescen* OR teen OR teens OR teenager* OR pediatr* OR Infantile <b>AND</b> 'upper limb'/exp OR 'hand strength'/exp OR 'pinch strength'/exp OR 'grip strength'/exp OR 'prehension'/exp OR Grip OR Grips OR Grasp OR Grasps OR Manipulation OR Fingertip OR Prehension OR 'pinch strength' OR Finger* OR arm OR arms OR shoulder OR forearm OR elbow OR axilla OR hand OR wrist OR metacarpus 'Upper Extremit*' OR 'upper limb*' OR pointing                                                                                                           | 1<br>764 |
| 'Cerebral palsy' OR 'little disease' OR 'brain palsy' OR 'brain paralysis' OR 'central palsy' OR 'central paralysis' OR 'cerebral paralysis' OR 'cerebral paresis' OR 'encephalopathia infantilis' OR 'spastic diplegia' OR preterm OR 'cerebral palsy'/exp OR 'little disease'/exp <b>AND</b> 'child'/exp OR 'adolescent'/exp OR 'brain damaged child'/exp OR Child OR children OR adolescen* OR teen OR teens OR teenager* OR pediatr* OR Infantile <b>AND</b> 'upper limb'/exp OR 'hand strength'/exp OR 'pinch strength'/exp OR 'grip strength'/exp OR 'prehension'/exp OR Grip OR Grips OR Grasp OR Grasps OR Manipulation OR Fingertip OR Prehension OR 'pinch strength' OR Finger* OR arm OR arms OR shoulder OR forearm OR elbow OR axilla OR hand OR wrist OR metacarpus 'Upper Extremit*' OR 'upper limb*' OR pointing <b>AND</b> planning OR anticipat* OR modulation OR 'predictive control' OR preparatory OR 'motor program' | 94       |

## OTSeeker

|                                                                                                                                                                                                                                                                                                                                                                                                                                                        |     |
|--------------------------------------------------------------------------------------------------------------------------------------------------------------------------------------------------------------------------------------------------------------------------------------------------------------------------------------------------------------------------------------------------------------------------------------------------------|-----|
| "Cerebral palsy" OR "little disease" OR "brain palsy" OR "brain paralysis" OR "central palsy" OR "central paralysis" OR "cerebral paralysis" OR "cerebral paresis" OR "encephalopathia infantilis" OR "spastic diplegia" OR preterm                                                                                                                                                                                                                    | 395 |
| ("Cerebral palsy" OR "little disease" OR "brain palsy" OR "brain paralysis" OR "central palsy" OR "central paralysis" OR "cerebral paralysis" OR "cerebral paresis" OR "encephalopathia infantilis" OR "spastic diplegia" OR preterm) <b>AND</b> (Child OR children OR adolescen* OR teen OR teens OR teenager* OR pediatr* OR Infantile)                                                                                                              | 267 |
| ("Cerebral palsy" OR "little disease" OR "brain palsy" OR "brain paralysis" OR "central palsy" OR "central paralysis" OR "cerebral paralysis" OR "cerebral paresis" OR "encephalopathia infantilis" OR "spastic diplegia" OR preterm) <b>AND</b> (Child OR children OR adolescen* OR teen OR teens OR teenager* OR pediatr* OR Infantile) <b>AND</b> (Grip OR Grips OR Grasp OR Grasps OR Manipulation OR Fingertip OR Prehension OR "pinch strength") | 101 |

|                                                                                                                                                                                                                                                                                                                                                                                                                                                                                                                                                                                                                                                                                                                           |          |
|---------------------------------------------------------------------------------------------------------------------------------------------------------------------------------------------------------------------------------------------------------------------------------------------------------------------------------------------------------------------------------------------------------------------------------------------------------------------------------------------------------------------------------------------------------------------------------------------------------------------------------------------------------------------------------------------------------------------------|----------|
| OR Finger* OR arm OR arms OR shoulder OR forearm OR elbow OR axilla OR hand OR wrist OR metacarpus OR "Upper Extremit*" OR "upper limb*" OR pointing)                                                                                                                                                                                                                                                                                                                                                                                                                                                                                                                                                                     |          |
| ("Cerebral palsy" OR "little disease" OR "brain palsy" OR "brain paralysis" OR "central palsy" OR "central paralysis" OR "cerebral paralysis" OR "cerebral paresis" OR "encephalopathia infantilis" OR "spastic diplegia" OR preterm) <b>AND</b> (Child OR children OR adolescen* OR teen OR teens OR teenager* OR pediater* OR Infantile) <b>AND</b> (Grip OR Grips OR Grasp OR Grasps OR Manipulation OR Fingertip OR Prehension OR "pinch strength" OR Finger* OR arm OR arms OR shoulder OR forearm OR elbow OR axilla OR hand OR wrist OR metacarpus OR "Upper Extremit*" OR "upper limb*" OR pointing) <b>AND</b> (planning OR anticipat* OR modulation OR "predictive control" OR preparatory OR "motor program*") | <b>4</b> |

## PEDro

|                                                        |     |
|--------------------------------------------------------|-----|
| Cerebral palsy (Topic)                                 | 731 |
| child* AND cerebral palsy (topic)                      | 631 |
| upper limb* AND child* AND cerebral palsy (topic)      | 74  |
| upper extremity* AND child* AND cerebral palsy (topic) | 58  |
| arm* AND child* AND cerebral palsy (topic)             | 48  |
| grip* AND child* AND cerebral palsy (topic)            | 10  |
| planning AND child* AND cerebral palsy (topic)         | 9   |
| anticipator* AND child* AND cerebral palsy (topic)     | 1   |
| modulation AND child* AND cerebral palsy (topic)       | 1   |

|                                                            |   |
|------------------------------------------------------------|---|
| "predictive control" AND child* AND cerebral palsy (topic) | 0 |
|------------------------------------------------------------|---|

## Web of sciences

|                                                                                                                                                                                                                                                                                                                                                                                                                                                                                                                                                                                                                                                                                                                           |            |
|---------------------------------------------------------------------------------------------------------------------------------------------------------------------------------------------------------------------------------------------------------------------------------------------------------------------------------------------------------------------------------------------------------------------------------------------------------------------------------------------------------------------------------------------------------------------------------------------------------------------------------------------------------------------------------------------------------------------------|------------|
| "Cerebral palsy" OR "little disease" OR "brain palsy" OR "brain paralysis" OR "central palsy" OR "central paralysis" OR "cerebral paralysis" OR "cerebral paresis" OR "encephalopathia infantilis" OR "spastic diplegia" OR preterm                                                                                                                                                                                                                                                                                                                                                                                                                                                                                       | 123,360    |
| ("Cerebral palsy" OR "little disease" OR "brain palsy" OR "brain paralysis" OR "central palsy" OR "central paralysis" OR "cerebral paralysis" OR "cerebral paresis" OR "encephalopathia infantilis" OR "spastic diplegia" OR preterm) <b>AND</b> (Child OR children OR adolescen* OR teen OR teens OR teenager* OR pediater* OR Infantile)                                                                                                                                                                                                                                                                                                                                                                                | 66,075     |
| ("Cerebral palsy" OR "little disease" OR "brain palsy" OR "brain paralysis" OR "central palsy" OR "central paralysis" OR "cerebral paralysis" OR "cerebral paresis" OR "encephalopathia infantilis" OR "spastic diplegia" OR preterm) <b>AND</b> (Child OR children OR adolescen* OR teen OR teens OR teenager* OR pediater* OR Infantile) <b>AND</b> (Grip OR Grips OR Grasp OR Grasps OR Manipulation OR Fingertip OR Prehension OR "pinch strength" OR Finger* OR arm OR arms OR shoulder OR forearm OR elbow OR axilla OR hand OR wrist OR metacarpus OR "Upper Extremity" OR "upper limb*" OR pointing)                                                                                                              | 6,513      |
| ("Cerebral palsy" OR "little disease" OR "brain palsy" OR "brain paralysis" OR "central palsy" OR "central paralysis" OR "cerebral paralysis" OR "cerebral paresis" OR "encephalopathia infantilis" OR "spastic diplegia" OR preterm) <b>AND</b> (Child OR children OR adolescen* OR teen OR teens OR teenager* OR pediater* OR Infantile) <b>AND</b> (Grip OR Grips OR Grasp OR Grasps OR Manipulation OR Fingertip OR Prehension OR "pinch strength" OR Finger* OR arm OR arms OR shoulder OR forearm OR elbow OR axilla OR hand OR wrist OR metacarpus OR "Upper Extremity" OR "upper limb*" OR pointing) <b>AND</b> (planning OR anticipat* OR modulation OR "predictive control" OR preparatory OR "motor program*") | <b>419</b> |

**Table S2.** Quality assessment.

|                        | <b>Q1</b> | <b>Q2</b> | <b>Q3</b> | <b>Q4</b> | <b>Q5</b> | <b>Q6</b> | <b>Q7</b> | <b>Q8</b> | <b>Q9</b> | <b>Q10</b> | <b>Q11</b> | <b>Q12</b> | <b>Q13</b> | <b>Q14</b> | <b>Total</b> | <b>Score<br/>in %</b> | <b>Quality</b> |
|------------------------|-----------|-----------|-----------|-----------|-----------|-----------|-----------|-----------|-----------|------------|------------|------------|------------|------------|--------------|-----------------------|----------------|
| Bleyenheuft, 2010      | 2         | 1         | 0         | 2         | NA        | NA        | NA        | 2         | 1         | 2          | 2          | 1          | 2          | 2          | <b>17</b>    | 77                    | Moderate       |
| Chen, 2007             | 2         | 1         | 2         | 2         | NA        | NA        | NA        | 2         | 2         | 2          | 2          | 1          | 2          | 2          | <b>20</b>    | 91                    | Very high      |
| Cope, 1998             | 2         | 2         | 1         | 2         | NA        | NA        | NA        | 2         | 1         | 1          | 0          | 1          | 2          | 2          | <b>16</b>    | 73                    | Moderate       |
| Cra  , 2009            | 2         | 1         | 1         | 2         | NA        | NA        | NA        | 1         | 2         | 2          | 1          | 1          | 2          | 2          | <b>17</b>    | 77                    | Moderate       |
| Cra  , 2010a           | 2         | 1         | 1         | 1         | NA        | NA        | NA        | 2         | 2         | 2          | 2          | 2          | 2          | 2          | <b>19</b>    | 86                    | High           |
| Cra  , 2010b           | 2         | 1         | 1         | 2         | NA        | NA        | NA        | 2         | 1         | 2          | 2          | 1          | 2          | 2          | <b>18</b>    | 82                    | High           |
| Duff, 2003             | 1         | 1         | 2         | 2         | NA        | NA        | NA        | 2         | 2         | 2          | 1          | 2          | 1          | 2          | <b>18</b>    | 82                    | High           |
| Ebner-Karestinos, 2018 | 2         | 1         | 2         | 2         | NA        | NA        | NA        | 2         | 2         | 2          | 2          | 1          | 2          | 2          | <b>20</b>    | 91                    | Very high      |
| Eliasson, 1991         | 1         | 1         | 0         | 1         | NA        | NA        | NA        | 2         | 1         | 1          | 2          | 0          | 2          | 2          | <b>13</b>    | 59                    | Very low       |
| Eliasson, 1992         | 1         | 1         | 0         | 1         | NA        | NA        | NA        | 1         | 1         | 1          | 2          | 0          | 1          | 2          | <b>11</b>    | 50                    | Very low       |
| Eliasson, 1995         | 2         | 1         | 0         | 1         | NA        | NA        | NA        | 2         | 1         | 2          | 2          | 1          | 2          | 2          | <b>16</b>    | 73                    | Moderate       |
| Eliasson, 2000         | 2         | 1         | 1         | 2         | NA        | NA        | NA        | 2         | 1         | 2          | 1          | 2          | 2          | 2          | <b>18</b>    | 82                    | High           |
| Eliasson, 2006         | 2         | 1         | 2         | 2         | NA        | NA        | NA        | 2         | 1         | 2          | 2          | 1          | 2          | 2          | <b>19</b>    | 86                    | High           |
| Forssberg, 1999        | 2         | 1         | 2         | 2         | NA        | NA        | NA        | 2         | 1         | 2          | 0          | 2          | 1          | 2          | <b>17</b>    | 77                    | Moderate       |
| Gordon, 1999a          | 1         | 1         | 2         | 1         | NA        | NA        | NA        | 2         | 1         | 1          | 0          | 1          | 2          | 2          | <b>14</b>    | 64                    | Low            |
| Gordon, 1999b          | 1         | 1         | 2         | 0         | NA        | NA        | NA        | 2         | 2         | 2          | 1          | 1          | 2          | 2          | <b>16</b>    | 73                    | Moderate       |
| Gordon, 1999c          | 2         | 1         | 0         | 0         | NA        | NA        | NA        | 2         | 1         | 2          | 2          | 1          | 1          | 2          | <b>14</b>    | 64                    | Low            |
| Gordon, 2003           | 2         | 1         | 2         | 1         | NA        | NA        | NA        | 2         | 2         | 2          | 1          | 0          | 2          | 2          | <b>17</b>    | 77                    | Moderate       |
| Gordon, 2006           | 2         | 1         | 2         | 2         | NA        | NA        | NA        | 2         | 0         | 2          | 2          | 0          | 2          | 2          | <b>17</b>    | 77                    | Moderate       |
| Hung, 2012             | 1         | 1         | 0         | 2         | NA        | NA        | NA        | 2         | 1         | 2          | 2          | 1          | 2          | 2          | <b>16</b>    | 73                    | Moderate       |

|                       |   |   |   |   |    |    |    |   |   |   |   |   |   |   |           |    |           |
|-----------------------|---|---|---|---|----|----|----|---|---|---|---|---|---|---|-----------|----|-----------|
| Islam, 2011           | 2 | 1 | 1 | 2 | NA | NA | NA | 2 | 1 | 2 | 2 | 2 | 2 | 2 | <b>19</b> | 86 | High      |
| Janssen, 2011         | 2 | 1 | 1 | 2 | NA | NA | NA | 2 | 1 | 1 | 2 | 0 | 2 | 1 | <b>15</b> | 68 | Low       |
| Kirkpatrick, 2013     | 2 | 1 | 1 | 2 | NA | NA | NA | 2 | 2 | 2 | 2 | 1 | 2 | 2 | <b>19</b> | 86 | High      |
| Krajenbrink, 2019     | 2 | 2 | 2 | 2 | NA | NA | NA | 2 | 2 | 2 | 2 | 1 | 2 | 2 | <b>21</b> | 95 | Very high |
| Kukke, 2015           | 2 | 1 | 0 | 2 | NA | NA | NA | 2 | 1 | 2 | 2 | 0 | 2 | 2 | <b>16</b> | 73 | Moderate  |
| Lust, 2018            | 2 | 2 | 1 | 2 | NA | NA | NA | 2 | 2 | 2 | 2 | 1 | 2 | 2 | <b>20</b> | 91 | Very high |
| Mutalib, 2019         | 2 | 1 | 0 | 2 | NA | NA | NA | 2 | 2 | 2 | 2 | 1 | 2 | 2 | <b>18</b> | 82 | High      |
| Mutsaarts, 2004       | 1 | 1 | 2 | 2 | NA | NA | NA | 2 | 0 | 2 | 2 | 0 | 1 | 2 | <b>15</b> | 68 | Low       |
| Mutsaarts, 2005       | 2 | 1 | 1 | 2 | NA | NA | NA | 2 | 1 | 2 | 2 | 1 | 2 | 2 | <b>18</b> | 82 | High      |
| Mutsaarts, 2006       | 1 | 1 | 1 | 1 | NA | NA | NA | 1 | 1 | 2 | 0 | 1 | 1 | 2 | <b>12</b> | 55 | Very low  |
| Prabhu, 2011          | 2 | 1 | 1 | 1 | NA | NA | NA | 2 | 1 | 2 | 2 | 1 | 2 | 2 | <b>17</b> | 77 | Moderate  |
| Rönnqvist, 2007       | 1 | 1 | 1 | 2 | NA | NA | NA | 2 | 1 | 2 | 2 | 2 | 2 | 2 | <b>18</b> | 82 | High      |
| Schwab, 2020          | 2 | 1 | 2 | 2 | NA | NA | NA | 2 | 1 | 2 | 2 | 1 | 2 | 2 | <b>19</b> | 86 | High      |
| Smits-Engelsman, 2011 | 1 | 1 | 1 | 1 | NA | NA | NA | 2 | 1 | 2 | 2 | 2 | 2 | 2 | <b>17</b> | 77 | Moderate  |
| Steenbergen, 1998     | 2 | 1 | 0 | 1 | NA | NA | NA | 2 | 1 | 2 | 1 | 1 | 2 | 2 | <b>15</b> | 68 | Low       |
| Steenbergen, 2000     | 2 | 1 | 2 | 2 | NA | NA | NA | 2 | 0 | 2 | 2 | 0 | 2 | 2 | <b>17</b> | 77 | Moderate  |
| Steenbergen, 2004a    | 2 | 1 | 1 | 1 | NA | NA | NA | 2 | 0 | 2 | 2 | 1 | 2 | 2 | <b>16</b> | 73 | Moderate  |
| Steenbergen, 2004b    | 2 | 1 | 2 | 1 | NA | NA | NA | 2 | 1 | 2 | 1 | 1 | 2 | 2 | <b>17</b> | 77 | Moderate  |
| Surkar, 2018a         | 2 | 0 | 2 | 2 | NA | NA | NA | 1 | 1 | 2 | 1 | 1 | 2 | 2 | <b>16</b> | 73 | Moderate  |
| Surkar, 2018b         | 2 | 1 | 2 | 2 | NA | NA | NA | 1 | 1 | 2 | 2 | 1 | 1 | 2 | <b>17</b> | 77 | Moderate  |
| Te Velde, 2005        | 2 | 0 | 0 | 1 | NA | NA | NA | 2 | 2 | 2 | 2 | 1 | 2 | 2 | <b>16</b> | 73 | Moderate  |
| Valvano, 1998         | 1 | 1 | 1 | 1 | NA | NA | NA | 1 | 0 | 2 | 1 | 2 | 2 | 2 | <b>14</b> | 64 | Low       |
| Van Elk, 2010         | 2 | 1 | 1 | 2 | NA | NA | NA | 2 | 1 | 2 | 2 | 1 | 2 | 2 | <b>18</b> | 82 | High      |
| Van Mier, 1994        | 2 | 1 | 1 | 1 | NA | NA | NA | 1 | 1 | 2 | 2 | 1 | 2 | 2 | <b>16</b> | 73 | Moderate  |
| Verrel, 2008          | 2 | 1 | 1 | 2 | NA | NA | NA | 2 | 0 | 2 | 2 | 0 | 2 | 2 | <b>16</b> | 73 | Moderate  |

|             |   |   |   |   |    |    |    |   |   |   |   |   |   |   |           |    |           |
|-------------|---|---|---|---|----|----|----|---|---|---|---|---|---|---|-----------|----|-----------|
| Wolff, 2015 | 2 | 2 | 2 | 2 | NA | NA | NA | 2 | 1 | 2 | 2 | 1 | 2 | 2 | <b>20</b> | 91 | Very high |
|-------------|---|---|---|---|----|----|----|---|---|---|---|---|---|---|-----------|----|-----------|



**Table S3.** Data extraction by motor planning variables.

| Authors                | Population of interest (sample size, sex, age in years)                                                | Control group if present                                       | CP Subtype, MACS and GMFCS scores if available                                                                                                | Design                | Task description, unimanual or bimanual, independent variables                                                                                                                                      | Main motor planning variables     | Results                                                                                                                                                                                                                    |
|------------------------|--------------------------------------------------------------------------------------------------------|----------------------------------------------------------------|-----------------------------------------------------------------------------------------------------------------------------------------------|-----------------------|-----------------------------------------------------------------------------------------------------------------------------------------------------------------------------------------------------|-----------------------------------|----------------------------------------------------------------------------------------------------------------------------------------------------------------------------------------------------------------------------|
| <b>Force</b>           |                                                                                                        |                                                                |                                                                                                                                               |                       |                                                                                                                                                                                                     |                                   |                                                                                                                                                                                                                            |
| Bleyenheuft, 2010      | $n = 12$ ( $12.7 \pm 2$ )<br>males: $n = 10$ ( $12.8 \pm 2.2$ )<br>females: $n = 2$ ( $12.2 \pm 0.5$ ) | $n = 12$<br>age and gender-matched                             | 8 left hemiplegia,<br>4 right hemiplegia<br>GMFCS level I = 8, II = 4                                                                         | Cross-sectional study | Grasp and lift with load drop self-generated (predictive) or by the experimenter (reactive)<br>Unimanual task with each of the two hands assessed                                                   | Delay to reach maximum grip force | After load drops, children with CP reach grip force with the timing similar to TD children with their less affected hand but showed a delay with their more affected hand for predictive and reactive trials.              |
| Duff, 2003             | $n = 18$ ( $10 \pm 1.8$ )<br>males: $n = 11$ ( $9.9 \pm 1.8$ )<br>females: $n = 7$ ( $10.3 \pm 1.8$ )  | $n = 18$<br>age-matched<br>males: $n = 8$<br>females: $n = 10$ | 10 left hemiplegia<br>8 right hemiplegia                                                                                                      | Cross-sectional study | Grasp and lift with familiar object (Exp.1) and new object of different shapes (Exp.2) with different weight in random or block presentation<br>Unimanual task assessed with the more affected hand | Forces rates                      | Children with CP adapted their force to object weight for familiar objects (Exp. 1) but were better able to apply an appropriate force to new object when the weight was presented in block rather than randomly (Exp. 2). |
| Ebner-Karestinos, 2018 | $n = 25$ ( $9.2 \pm 1.7$ )<br>males: $n = 8$<br>females: $n = 17$                                      | $n = 25$<br>age matched                                        | Unilateral cerebral palsy<br>19 left hemiparesis<br>15 right hemiparesis<br>MACS level I = 3, II = 21, III = 1<br>GMFCS level I = 13, II = 12 | Cross-sectional study | Grasp and lift an object while going down a step<br>Unilateral task with each of the two hands assessed                                                                                             | Forces ratio                      | For the more affected hand, children with CP had a higher force ratio compared to the less affected hand and both hands of TD children                                                                                     |

|                |                                       |                           |                            |                                   |                                                                                                                                                                                                                        |                                              |                                                                                                                                                                           |
|----------------|---------------------------------------|---------------------------|----------------------------|-----------------------------------|------------------------------------------------------------------------------------------------------------------------------------------------------------------------------------------------------------------------|----------------------------------------------|---------------------------------------------------------------------------------------------------------------------------------------------------------------------------|
| Eliasson, 1991 | <i>n</i> = 12, between 6-8 years old  | <i>n</i> = 12 age-matched | 6 hemiplegia<br>6 diplegia | Cross-sectional study             | Grasp and lift<br>Unilateral task<br>Children with hemiplegia grasped with their impaired hand and children with diplegia with their dominant hand                                                                     | Forces ratio and grip force rate             | Children with CP showed a delay in forces initiation and grip force variation instead of a grip force rate peak.                                                          |
| Eliasson, 1992 | <i>n</i> = 12, between 6-8 years old  | <i>n</i> = 12 age-matched | 6 hemiplegia<br>6 diplegia | Cross-sectional study             | Grasp and lift an object with random or blocked weight presentation (200g or 400g)<br>Unilateral task<br>Children with hemiplegia grabbed with their impaired hand and children with diplegia with their dominant hand | Forces rates                                 | Children with CP generated sequential forces with irregularities and an excessive grip and load force rates independently of the weight of the object.                    |
| Eliasson, 1995 | <i>n</i> = 12, between 6-8 years old  | <i>n</i> = 12 age-matched | 6 hemiplegia<br>6 diplegia | Cross-sectional study             | Grasp and lift with random or blocked texture presentation (silk or sandpaper)<br>Children with hemiplegia grabbed with their impaired hand and children with diplegia with their dominant hand                        | Forces ratio and grip force rate             | Children with CP had higher forces ratio and rate compared to TD children. They were able to differentiate textures in block presentation but not in random presentation. |
| Eliasson, 2000 | <i>n</i> = 14 (10 ± 1.6)              | <i>n</i> = 14 age-matched | Hemiplegia                 | Cross-sectional study             | Grasp, lift and release an object in 10 trials with 200g, followed by 10 trials with 400g<br>Unilateral task with the more affected hand                                                                               | Velocity, grip force rate, load force rate   | Children with CP showed sequential forces decreased unlike TD children but were still able to scale the rate of force based on the object weight.                         |
| Eliasson, 2006 | <i>n</i> = 10 between 19-21 years old |                           | 6 hemiplegia<br>6 diplegia | ? (follow-up Eliasson 1991, 1992) | Grasp and lift an object with random or blocked weight presentation (200g or 400g)<br>Unilateral task                                                                                                                  | Change in grip-lift synergy throughout years | Participants with CP showed reduced grip/lift ratios compared to 13 years earlier.                                                                                        |

|                 |                                                                       |                                                                |            |                       |                                                                                                                                                                  |                                                                                                                                              |                                                                                                                                                                                                                                     |
|-----------------|-----------------------------------------------------------------------|----------------------------------------------------------------|------------|-----------------------|------------------------------------------------------------------------------------------------------------------------------------------------------------------|----------------------------------------------------------------------------------------------------------------------------------------------|-------------------------------------------------------------------------------------------------------------------------------------------------------------------------------------------------------------------------------------|
|                 |                                                                       |                                                                |            |                       | Children with hemiplegia grabbed with their impaired hand and children with diplegia with their dominant hand                                                    |                                                                                                                                              |                                                                                                                                                                                                                                     |
| Forssberg, 1999 | $n = 13 (8 \pm 2.6)$                                                  |                                                                | Hemiplegia | Cross-sectional study | Grasp and lift an object<br>Unilateral task assessed with each of the two hands                                                                                  | Grip-lift synergy (sum of 3 variables : duration of preload phase, grip force at onset of load force, timing of peak of the grip force rate) | For the more affected hand, half of the children had an absence of grip-lift synergy whereas for the less affected hand, almost all children presented a well-developed synergy.                                                    |
| Gordon, 1999a   | $n = 15$<br>between 8-14 years                                        | $n = 15$<br>age-matched                                        | Hemiplegia | Cross-sectional study | Grasp and lift object with silk or sandpaper surfaces<br>Unimanual task assessed with the more affected hand                                                     | Percentage difference in grip force rate                                                                                                     | Children with CP did not adapt their grip force rate to the object's texture unlike TD children.                                                                                                                                    |
| Gordon, 1999b   | $n = 15$<br>between 8-14 years<br>males: $n = 10$<br>females: $n = 5$ | $n = 15$<br>age-matched<br>males: $n = 5$<br>females: $n = 10$ | Hemiplegia | Cross-sectional study | Grasp and lift object with different weight and textures in block or random presentation during 25 trials<br>Unimanual task assessed with the more affected hand | Forces rates                                                                                                                                 | Children with CP needed more trials than TD children to correctly adapt their force rate to texture or weight. Whereas TD children showed few changes during trials, children with CP improved their performance throughout trials. |
| Gordon, 1999c   | $n = 14$<br>between 8-14 years<br>males: $n = 9$<br>females: $n = 5$  | $n = 14$<br>age-matched                                        | Hemiplegia | Cross-sectional study | Grasp and lift object of 200g or 400g and bilateral transfer<br>Unimanual task with each of the hands assessed                                                   | Forces rates                                                                                                                                 | Children with CP did not adapt their force rate to the weight of the object with their affected hand, but did with their less affected hand like TD children.                                                                       |

|               |                                                                                                        |                                                                       |                                                                                  |                              |                                                                                                                                                                                                                  |                                                     |                                                                                                                                                                                                                                                                                                                              |
|---------------|--------------------------------------------------------------------------------------------------------|-----------------------------------------------------------------------|----------------------------------------------------------------------------------|------------------------------|------------------------------------------------------------------------------------------------------------------------------------------------------------------------------------------------------------------|-----------------------------------------------------|------------------------------------------------------------------------------------------------------------------------------------------------------------------------------------------------------------------------------------------------------------------------------------------------------------------------------|
| Gordon, 2003  | $n = 15$<br>between 7-14<br>years                                                                      | $n = 15$<br>age-<br>matched                                           | Hemiplegia                                                                       | Cross-<br>sectional<br>study | Grasp, lift and release an<br>object with different task<br>end constraints (low or<br>high accuracy), at<br>preferred speed or as fast<br>as possible<br>Unilateral task with each of<br>the two hands assessed | Velocity and<br>grip force rate                     | For children with CP, the<br>release phase showed<br>greater impairment with<br>the more affected hand,<br>mostly when higher<br>accuracy and speed<br>were required. For the<br>less affected hand,<br>impaired temporal<br>coordination of the<br>phases was observed.                                                     |
| Gordon, 2006  | $n = 8 (8.7 \pm 3.2)$<br>all were males                                                                |                                                                       | 2 left hemiplegia<br>6 right hemiplegia                                          | Cross-<br>sectional<br>study | Grasp and lift object (200g<br>or 400g) with passive or<br>active hand change<br>between the first and the<br>following lifts<br>Unilateral task with each of<br>the two hands assessed                          | Forces rates                                        | Children with CP did not<br>adapt their force rate to<br>weight with the more<br>affected hand but did<br>with the less affected<br>hand. They were able to<br>generalize the knowledge<br>of weight from the less<br>affected hand to the<br>affected hand but also<br>from the affected hand to<br>the less affected hand. |
| Islam, 2011   | $n = 12 (14.4 \pm 3.3)$<br>males: $n = 6$<br>( $13.2 \pm 2.1$ )<br>females: $n = 6$ ( $15.3 \pm 4$ )   | $n = 15$<br>age-<br>matched                                           | 4 left hemiplegia,<br>8 right hemiplegia                                         | Cross-<br>sectional<br>study | Grasp and lift one object<br>with each hand, placed top<br>on the other<br>Bimanual task with each<br>hand alternatively use as<br>the holding hand                                                              | Force<br>amplitude                                  | Even though deficits in<br>force scaling were more<br>pronounced when the<br>more affected hand was<br>used as the holding<br>hand, children with CP<br>showed deficits in all<br>conditions.                                                                                                                                |
| Mutalib, 2019 | $n = 15 (8.7 \pm 2.7)$<br>males: $n = 9$<br>( $8.6 \pm 2.5$ )<br>females: $n = 6$<br>( $8.9 \pm 3.3$ ) | $n = 17$<br>( $8.2 \pm 2.5$ )<br>male: $n = 7$<br>female:<br>$n = 10$ | 9 left hemiplegia,<br>6 right hemiplegia<br>MACS level I = 5,<br>II = 6, III = 4 | Cross-<br>sectional<br>study | Grasp and lift a cube<br>Bimanual task                                                                                                                                                                           | Isometric<br>grasp force /<br>load force<br>synergy | Children with CP<br>coordinated their grasp<br>force according to the<br>load force.                                                                                                                                                                                                                                         |

|                                 |                                                                                                      |                                    |                                                                                            |                       |                                                                                                                                                               |                                                |                                                                                                                                                                                   |
|---------------------------------|------------------------------------------------------------------------------------------------------|------------------------------------|--------------------------------------------------------------------------------------------|-----------------------|---------------------------------------------------------------------------------------------------------------------------------------------------------------|------------------------------------------------|-----------------------------------------------------------------------------------------------------------------------------------------------------------------------------------|
| Prabhu, 2011                    | $n = 11$ (7.6)<br>males: $n = 4$<br>females: $n = 7$                                                 |                                    | 5 left hemiplegia,<br>6 right hemiplegia                                                   | Cross-sectional study | Grasp and lift while walking<br>Unimanual task with each of the two hands assessed                                                                            | Forces ratio and rates                         | Children with CP showed impaired force coupling with the more affected hand compared to the less affected hand                                                                    |
| Schwab, 2020                    | $n = 10$ ( $12.8 \pm 3.4$ )<br>males: $n = 7$<br>females: $n = 3$                                    | $n = 10$<br>age and gender-matched | 8 hemiplegia, 2 diplegia<br>MACS level I = 7, II = 2, III = 1<br>GMFCS level I = 8, II = 2 | Cross-sectional study | Rasp, lift and transport a weight to a predictable or unpredictable location<br>Unilateral task with each of the two hands assessed                           | Forces coupling                                | Children with CP showed an impaired grip control prior to load force onset compared to TD children, mostly when they were told to transport the object on a predictable location. |
| Smits-Engelsman, 2011           | $n = 11$ ( $10 \pm 2$ )<br>males: $n = 7$<br>females: $n = 5$                                        | $n = 24$<br>age-matched            | 5 left hemiplegia, 7 right hemiplegia<br>MACS level I = 3, II = 6, III = 3                 | Cross-sectional study | Grasp and lift two objects with each hand, placed on top on the other and separate them<br>Bimanual task with each hand alternatively use as the holding hand | Grip force                                     | Children with CP presented impaired ability to coordinate forces compared with TD children.                                                                                       |
| Valvano, 1998                   | $n = 8$ ( $10.3 \pm 4.2$ )                                                                           | $n = 8$<br>age-matched             | Spastic diplegia and quadriplegia                                                          | Cross-sectional study | Grasp and lift an object<br>Unilateral task with the less affected hand                                                                                       | Change of error measure across blocks practice | Children with CP decreased their error less than TD children across blocks.                                                                                                       |
| <b>End-state-comfort effect</b> |                                                                                                      |                                    |                                                                                            |                       |                                                                                                                                                               |                                                |                                                                                                                                                                                   |
| Craje, 2009                     | $n = 22$ ( $16.2 \pm 2.2$ )<br>males: $n = 13$ ( $16 \pm 2.6$ )<br>females: $n = 9$ ( $16 \pm 1.6$ ) |                                    | 12 left hemiplegia, 10 right hemiplegia                                                    | Cross-sectional study | Reach-to-grasp a bar and transport it in a rod-and-frame illusion<br>Unimanual task assessed with the less affected hand                                      | Grip types                                     | Almost none of the children with CP used a grip leading to comfortable end posture.                                                                                               |
| Craje, 2010a                    | $n = 24$<br>6 children in each age group (3-years-old, 4-years-old, 5-years-old, 6-years-old)        | $n = 24$<br>age-matched            | 11 left unilateral CP, 13 right unilateral CP                                              | Cross-sectional study | Sword task<br>Unilateral task assessed with the less affected hand                                                                                            | Comfortable end posture                        | Children with CP showed less comfortable final hand posture than TD children. Age effect was found in TD but not the children with CP.                                            |

|                   |                                                                                                           |                                                                   |                                                                                      |                                   |                                                                                                                                                    |                                                                                         |                                                                                                                                                                                                                                                          |
|-------------------|-----------------------------------------------------------------------------------------------------------|-------------------------------------------------------------------|--------------------------------------------------------------------------------------|-----------------------------------|----------------------------------------------------------------------------------------------------------------------------------------------------|-----------------------------------------------------------------------------------------|----------------------------------------------------------------------------------------------------------------------------------------------------------------------------------------------------------------------------------------------------------|
|                   | males: $n = 13$<br>females: $n = 11$                                                                      |                                                                   |                                                                                      |                                   |                                                                                                                                                    |                                                                                         |                                                                                                                                                                                                                                                          |
| Craje, 2010b      | $n = 10$ ( $19.1 \pm 0.9$ )<br>males: $n = 7$ ( $8.6 \pm 1.8$ )<br>females: $n = 3$ ( $18.8 \pm 0.9$ )    | $n = 10$ ( $22.2 \pm 2.1$ )<br>males: $n = 5$<br>females: $n = 5$ | Right hemiplegia                                                                     | Cross-sectional study             | Knob on a wheel with visual cues<br>Unilateral task assessed with the less affected hand                                                           | Proportion of task failure (i.e., using a grip leading to uncomfortable finale posture) | Children with CP failed on more trials than TD children, especially for larger wheel rotation and counterclockwise rotation.                                                                                                                             |
| Hung, 2012        | $n = 10$ ( $7.3 \pm 1.9$ )<br>males: $n = 5$<br>females: $n = 5$                                          | $n = 10$ age-matched<br>males: $n = 7$<br>females: $n = 3$        | 6 right hemiplegia<br>4 left hemiplegia                                              | Cross-sectional study             | Reach-to-grasp-to-eat a cookie<br>Unilateral task with each of the two hands assessed                                                              | Grasp height                                                                            | Children with CP showed higher grasp end positions than TD children.                                                                                                                                                                                     |
| Janssen, 2011     | $n = 13$ ( $9.2 \pm 1.6$ )<br>males: $n = 6$ ( $9.7 \pm 2.2$ )<br>females: $n = 7$ ( $8.8 \pm 1.6$ )      | $n = 24$ ( $9.4 \pm 1.6$ )<br>males: $n = 7$<br>females: $n = 17$ | 7 left hemiplegia<br>6 right hemiplegia                                              | Cross-sectional study             | Reach-to-grasp a cylinder on a shelf and transport it to another one<br>Unimanual and bimanual congruent or incongruent (different shelves height) | Grasp height                                                                            | In a unimanual and bimanual congruent task, no modulation of grasp height was found according to shelf height or age in children with CP. In an incongruent bimanual task, they showed an inappropriate grasp height only with their less affected hand. |
| Kirkpatrick, 2013 | $n = 76$ ( $9.1 \pm 2.9$ )<br>males: $n = 46$ ( $9.2 \pm 3$ )<br>females: $n = 30$ ( $8.9 \pm 2.8$ )      |                                                                   | 40 left hemiplegia, 36 right hemiplegia                                              | Cross-sectional study             | Knob on a wheel to turn clockwise or counterclockwise<br>Unimanual task assessed with the less affected hand                                       | Initial grasp                                                                           | An effect of age was found on grasp in children with CP. A lesion side effect was found only in interaction with turn direction.                                                                                                                         |
| Krajenbrink, 2019 | $n = 104$ ( $9.2 \pm 1.1$ ); 16 6-years-old, 22 7-years-old, 12 8-years-old, 13 9-years-old, 22 10-years- |                                                                   | 56 left unilateral CP, 48 right unilateral CP<br>MACS level I = 25, II = 74, III = 5 | Cross-sectional prospective study | Sword task<br>Unimanual task assessed with the less affected hand                                                                                  | Percentage of comfortable end posture                                                   | No differences across age groups or hemiplegic side were found for the % of trials of comfortable end posture.                                                                                                                                           |

|                   |                                                                                                                                                          |                                                                                |                                                                                                                                                        |                       |                                                                                                                                                                                                                    |                                       |                                                                                                                                                                                                        |
|-------------------|----------------------------------------------------------------------------------------------------------------------------------------------------------|--------------------------------------------------------------------------------|--------------------------------------------------------------------------------------------------------------------------------------------------------|-----------------------|--------------------------------------------------------------------------------------------------------------------------------------------------------------------------------------------------------------------|---------------------------------------|--------------------------------------------------------------------------------------------------------------------------------------------------------------------------------------------------------|
|                   | old, 11 11-years-old, 8 12-years-old)                                                                                                                    |                                                                                | GMFCS level I = 79, II = 25                                                                                                                            |                       |                                                                                                                                                                                                                    |                                       |                                                                                                                                                                                                        |
| Lust, 2018        | $n = 22$ ( $7 \pm 1.2$ )<br>males: $n = 9$<br>females: $n = 13$                                                                                          | $n = 22$<br>age-matched<br>male: $n = 10$<br>female: $n = 12$                  | 9 left hemiplegia<br>9 right hemiplegia<br>4 bilateral CP<br>MACS level I = 7, II = 10, III = 3, IV = 1<br>GMFCS level I = 15, II = 4, III = 1, IV = 2 | Longitudinal study    | Transport bar task measured at three times<br>Unimanual task assessed with the less affected hand                                                                                                                  | Proportion of comfortable end posture | No improvement was observed between the first and the last measure (2 years apart) in children with CP, in contrast to TD children.                                                                    |
| Mutsaerts, 2004   | $n = 3$ ( $16 \pm 2$ )<br>males: $n = 2$ ( $14.9 \pm 0.8$ )<br>females: $n = 1$ (18.3 years old)                                                         | $n = 11$ ( $22.5 \pm 3.6$ )<br>males: $n = 4$<br>females: $n = 7$              | 2 right hemiparesis, 1 left hemiparesis                                                                                                                | Cross-sectional study | Reach-to-grasp and then lift or turn<br>Unimanual task assessed with the affected hand                                                                                                                             | Hand orientation                      | In children with CP, task goal did not influence hand orientation.                                                                                                                                     |
| Mutsaerts, 2006   | $n = 7$ ( $16.8 \pm 1.4$ )<br>males: $n = 5$ ( $16.8 \pm 1.5$ )<br>females: $n = 6$ ( $17.3 \pm 0.8$ )                                                   | $n = 11$ ( $20.2 \pm 2.7$ )                                                    | 4 left hemiparesis<br>7 right hemiparesis                                                                                                              | Cross-sectional study | Knob with instructed rotation (Exp. 1) or arrow position incongruent or congruent indicating amount of rotation (Exp.2)<br>Unimanual task assessed with the less affected hand                                     | Grasping pattern                      | Children with CP showed reduced adaptation of grasp pattern according to rotation instruction compared to TD children, and were unable to inhibit incongruent visual information to perform correctly. |
| Steenbergen, 2000 | Exp 1.<br>$n = 8$ ( $17.2 \pm 1.7$ )<br>males: $n = 7$ ( $17.3 \pm 1.8$ )<br>females: $n = 1$ (16 years old)<br><br>Exp 2.<br>$n = 7$ ( $17.1 \pm 1.8$ ) | Exp 1.<br>$n = 8$ ( $27 \pm 3.9$ )<br><br>Exp 2.<br>$n = 7$ ( $25.8 \pm 2.1$ ) | Left spastic hemiparesis                                                                                                                               | Cross-sectional study | Exp.1<br>Reach-to-grasp a bicolor bar and transport to 5 possible targets<br>Unilateral task with each of the two hands assessed<br><br>Exp.2<br>Bicolor bar on a wheel to turn in a clockwise or counterclockwise | Grip type                             | Children with CP used fewer grip types, leading to less comfortable end postures (Exp 1 and 2) than TD children.                                                                                       |

|                          |                                                                                                                                                                                                                                                    |                                                                                                            |                                                                                 |                                                                                                                                                                                                                                                                                       |                                                                                                                |                                                                                                                                                                                                                         |                                                                                                                                                   |
|--------------------------|----------------------------------------------------------------------------------------------------------------------------------------------------------------------------------------------------------------------------------------------------|------------------------------------------------------------------------------------------------------------|---------------------------------------------------------------------------------|---------------------------------------------------------------------------------------------------------------------------------------------------------------------------------------------------------------------------------------------------------------------------------------|----------------------------------------------------------------------------------------------------------------|-------------------------------------------------------------------------------------------------------------------------------------------------------------------------------------------------------------------------|---------------------------------------------------------------------------------------------------------------------------------------------------|
|                          | males: $n = 6$<br>( $17.2 \pm 2$ )<br>female: $n = 1$ (16 years old)                                                                                                                                                                               |                                                                                                            |                                                                                 |                                                                                                                                                                                                                                                                                       | Unilateral task with each of the two hands assessed                                                            |                                                                                                                                                                                                                         |                                                                                                                                                   |
| Steenbergen, 2004a       | Exp 1.<br>$n = 11$ ( $16.4 \pm 1.8$ )<br>males: $n = 5$<br>( $16.8 \pm 1.9$ )<br>females: $n = 6$<br>( $16 \pm 1.9$ )<br><br>Exp 2.<br>$n = 10$ ( $17 \pm 1.7$ )<br>males: $n = 6$<br>( $17.6 \pm 1.7$ )<br>females: $n = 4$<br>( $16.1 \pm 1.4$ ) | Exp 1.<br>6 right hemiplegia<br>5 left hemiplegia<br><br>Exp 2.<br>5 right hemiplegia<br>5 left hemiplegia | Cross-sectional study                                                           | Exp.1<br>Grasp a pencil presented in different directions to touch circle of different diameters<br>Unilateral task with each of the two hands assessed<br><br>Exp. 2<br>Grasp task (cylinder, glass or glass + pouring water)<br>Unilateral task with each of the two hands assessed | Grip type                                                                                                      | Children with CP used an initial comfortable posture with the affected hand but did not adapt their grip according to precision requirement (Exp 1) nor task context (Exp 2.), in contrast to their less affected hand. |                                                                                                                                                   |
| Van Elk, 2010            | $n = 10$ ( $18.3 \pm 1.2$ )<br>males: $n = 7$<br>( $18.4 \pm 1.8$ )<br>females: $n = 3$<br>( $19 \pm 0.5$ )                                                                                                                                        | $n = 10$ ( $19.7 \pm 2.2$ )<br>males: $n = 2$<br>females: $n = 8$                                          | Right spastic hemiparesis                                                       | Cross-sectional study                                                                                                                                                                                                                                                                 | Knob on a wheel to turn clockwise or counter-clockwise<br>Unilateral task assessed with the less affected hand | Initial grip                                                                                                                                                                                                            | Children with CP preferred to use a comfortable initial grip posture, unlike TD children.                                                         |
| Spatiotemporal variables |                                                                                                                                                                                                                                                    |                                                                                                            |                                                                                 |                                                                                                                                                                                                                                                                                       |                                                                                                                |                                                                                                                                                                                                                         |                                                                                                                                                   |
| Chen, 2007               | $n = 17$ ( $4.2 \pm 1$ )<br>males: $n = 13$<br>( $4.1 \pm 1.1$ )<br>females: $n = 4$<br>( $4.4 \pm 0.9$ )                                                                                                                                          | $n = 17$ age-matched<br>males: $n = 5$<br>females: $n = 12$<br><br>$n = 20$<br>( $24.9 \pm 3.7$ )          | 3 hemiplegia, 11 diplegia, 3 quadriplegia<br>GMFCS level I = 6, II = 3, III = 8 | Cross-sectional study                                                                                                                                                                                                                                                                 | Reach-to-grasp a ball and fit it or throw it<br>Unilateral task assessed with the less affected hand           | Percentage of time to peak velocity                                                                                                                                                                                     | Unlike TD children, no difference in percentage of time to peak velocity between the fitting and the throwing task was found in children with CP. |



|                    |                                                                                                        |                                                          |                                                                            |                       |                                                                                                              |                                                       |                                                                                                                                                                               |
|--------------------|--------------------------------------------------------------------------------------------------------|----------------------------------------------------------|----------------------------------------------------------------------------|-----------------------|--------------------------------------------------------------------------------------------------------------|-------------------------------------------------------|-------------------------------------------------------------------------------------------------------------------------------------------------------------------------------|
|                    |                                                                                                        | males: $n = 2$<br>females: $n = 18$                      |                                                                            |                       |                                                                                                              |                                                       |                                                                                                                                                                               |
| Cope, 1998         | $n = 13$ ( $7.8 \pm 3.2$ )<br>males: $n = 8$ ( $8.8 \pm 2.7$ )<br>females: $n = 5$ ( $6 \pm 1.7$ )     | $n = 13$<br>age and gender-matched                       | Children with quadriplegia                                                 | Cross-sectional study | Reach-to-grasp a sphere of various sizes and weights<br>Unilateral task assessed with the less affected hand | Finger-thumb aperture                                 | Unlike TD children, children with CP used a whole-hand grip and a large hand aperture independent of object size.                                                             |
| Kukke, 2015        | $n = 11$ ( $17.5 \pm 5$ )<br>males: $n = 8$ ( $18.2 \pm 5.4$ )<br>females: $n = 3$ ( $15.6 \pm 4$ )    | $n = 9$ ( $16.6 \pm 4.9$ )                               | 9 left hemiplegia, 2 right hemiplegia<br>MACS level I = 3, II = 7, III = 1 | Cross-sectional study | Reach-to-grasp and lift a rod<br>Unilateral task assessed with each of the two hands                         | Time to maximum hand aperture                         | Children with CP showed a time to maximum hand aperture similar to TD group, for each of the two hands.                                                                       |
| Rönnqvist, 2007    | $n = 11$ ( $8.5 \pm 2.3$ )<br>males: $n = 4$ ( $10 \pm 2.1$ )<br>females: $n = 7$ ( $8 \pm 2.2$ )      | $n = 11$ ( $8.1$ )<br>males: $n = 5$<br>females: $n = 5$ | 2 left hemiplegia<br>9 right hemiplegia<br>6 mild, 5 moderate              | Cross-sectional study | Reach-to-grasp an object and transport until a cue<br>Unilateral task with each of the two hands assessed    | Grip aperture                                         | Children with CP had later peak aperture with either hand compared to TD children.                                                                                            |
| Steenbergen, 1998  | $n = 14$ ( $16.7 \pm 1.2$ )<br>males: $n = 11$ ( $17 \pm 1.1$ )<br>females: $n = 3$ ( $15.7 \pm 1.7$ ) |                                                          | 7 left hemiparesis<br>7 right hemiparesis                                  | Cross-sectional study | Grasp and lift a tube of 20g or 200g<br>Unimanual task with each of the two hands assessed                   | Duration of movement phases                           | Children with CP were able to adapt their movement duration across trials according to the weight of the object but showed a longer in-contact time with their affected hand. |
| Steenbergen, 2004b | $n = 6$ ( $17.3 \pm 1.2$ )                                                                             |                                                          | 3 left hemiplegia<br>3 right hemiplegia                                    | Cross-sectional study | Grasp and lift a disc of various sizes and distances<br>Unimanual task with each of the two hands assessed   | Time to peak velocity and time to peak grasp aperture | Children with CP showed a delay in peak velocity and grasp aperture, irrespective of the hand used and object size.                                                           |
| Wolff, 2015        | $n = 10$ ( $8.6 \pm 2.7$ )<br>males: $n = 6$<br>females: $n = 4$                                       | $n = 10$ ( $9.7 \pm 2.3$ )                               | 6 right unilateral CP, 4 left unilateral CP                                | Cross-sectional study | Reach-to-grasp objects with different shapes<br>Unilateral task with each of the two hands assessed          | Hand posture differentiation                          | Children with CP are able to adapt their grasp according to object shape but used fewer                                                                                       |

|                 |                                                                                                                                        | males: $n = 4$<br>females: $n = 6$                            | MACS level I = 6,<br>II = 4                                                                                       |                       |                                                                                                                                                                  |                                                                            | joints with the affected hand and a larger delay to use the suitable grasp.                                                                                                            |
|-----------------|----------------------------------------------------------------------------------------------------------------------------------------|---------------------------------------------------------------|-------------------------------------------------------------------------------------------------------------------|-----------------------|------------------------------------------------------------------------------------------------------------------------------------------------------------------|----------------------------------------------------------------------------|----------------------------------------------------------------------------------------------------------------------------------------------------------------------------------------|
| Reaction time   |                                                                                                                                        |                                                               |                                                                                                                   |                       |                                                                                                                                                                  |                                                                            |                                                                                                                                                                                        |
| Mutsaarts, 2005 | $n = 7 (17.3 \pm 2.1)$<br>males: $n = 2 (15.5 \pm 3.5)$<br>females: $n = 5 (18 \pm 1.2)$                                               | $n = 7 (19.3 \pm 1.4)$<br>males: $n = 2$<br>females: $n = 5$  | Right hemiplegia                                                                                                  | Cross-sectional study | Knob with different angle rotation indicating with LED Unimanual task assessed with the less impaired hand                                                       | Reaction time (time to movement onset)                                     | Children with CP showed anticipation when the task was composed of a single movement unit but not when it involved a sequence of movements.                                            |
| Van Elk, 2010   | $n = 10 (18.3 \pm 1.2)$<br>males: $n = 7 (18.4 \pm 1.8)$<br>females: $n = 3 (19 \pm 0.5)$                                              | $n = 10 (19.7 \pm 2.2)$<br>males: $n = 2$<br>females: $n = 8$ | Right spastic hemiparesis                                                                                         | Cross-sectional study | Knob on a wheel to turn clockwise or counterclockwise Unilateral task assessed with the less impaired hand                                                       | Reaction time                                                              | Children with CP showed longer reaction times for larger rotation, similar to TD children.                                                                                             |
| Van Mier, 1994  | $n = 10$<br>between 8-10 years old<br>male: $n = 6$<br>female: $n = 4$                                                                 | $n = 30$<br>(10 6-years-old, 10 8-years-old, 10 10-years-old) |                                                                                                                   | Cross-sectional study | Draw a symbol with various pattern complexities as quickly as possible after a go cue while either one model is presented or 2 models pre-indicated or not       | Initiation time (interval between go-signal and beginning of the movement) | Pattern complexity and cues influenced initiation movement time in all groups but children with CP took more time to prepare movement. An effect of age was found only in TD children. |
| te Velde, 2004  | $n = 23 (11.2 \pm 2.8)$<br>males: $n = 13 (11.8 \pm 2.3)$<br>females: $n = 10 (10.5 \pm 3.3)$<br><br>Exp 1.<br>$n = 22 (11.3 \pm 2.9)$ | $n = 22$<br>age and gender-matched                            | Exp 1.<br>11 right, 11 left mild to moderate hemiparesis<br><br>Exp. 2<br>7 right hemiparesis, 5 left hemiparesis | Cross-sectional study | Crossing the road with a playmobil avoiding cars at different distance moving at different speeds (Exp. 1) with each of the two hands (Exp.2)<br>Unilateral task | Movement initiation                                                        | Children with CP showed a delay to initiate movement (Exp 1). Hemiplegic side effect was only found for the more affected hand (Exp 2).                                                |

|                             |                                                                                                      |                                                                                                 |                                                                               |                       |                                                                                                                                                       |                                                                                                         |                                                                                                                                                                                                                                                                     |
|-----------------------------|------------------------------------------------------------------------------------------------------|-------------------------------------------------------------------------------------------------|-------------------------------------------------------------------------------|-----------------------|-------------------------------------------------------------------------------------------------------------------------------------------------------|---------------------------------------------------------------------------------------------------------|---------------------------------------------------------------------------------------------------------------------------------------------------------------------------------------------------------------------------------------------------------------------|
|                             | Exp 2.<br>$n = 12$ ( $12.5 \pm 1.9$ )                                                                |                                                                                                 |                                                                               |                       |                                                                                                                                                       |                                                                                                         |                                                                                                                                                                                                                                                                     |
| Surkar, 2018a               | $n = 12$ ( $6.8 \pm 2.7$ )<br>males: $n = 7$ ( $7.1 \pm 3.2$ )<br>females: $n = 5$ ( $6.4 \pm 2.7$ ) | $n = 15$ ( $5.8 \pm 1.1$ )                                                                      | 8 left hemiplegia<br>4 right hemiplegia<br>MACS level II = 2, III = 8, IV = 2 | Cross-sectional study | Shape matching task<br>Unilateral task tested with both hands                                                                                         | Reaction time                                                                                           | Children with CP showed longer reaction times than TD children.                                                                                                                                                                                                     |
| <b>Visuomotor variables</b> |                                                                                                      |                                                                                                 |                                                                               |                       |                                                                                                                                                       |                                                                                                         |                                                                                                                                                                                                                                                                     |
| Verrel, 2008                | $n = 6$ ( $16.2 \pm 1.8$ )<br>male: $n = 1$<br>females: $n = 5$                                      | $n = 10$<br>between 20-25 years old<br>male: $n = 1$<br>females: $n = 9$                        | 3 left hemiplegia<br>3 right hemiplegia                                       | Cross-sectional study | Reach-to-grasp and transport an object with or without obstacle<br>Unilateral task with each of the two hands assessed                                | Movement onset asynchrony (time-gap between movement start and onset of the saccade leaving the object) | Children with CP had a longer movement onset asynchrony, more intermediate fixations (mostly when obstacles are present) and more proximity between gaze and hand with their more affected hand compared to their less affected hand and both hands of TD children. |
| Surkar, 2018b               | $n = 13$ ( $6.8 \pm 2.9$ )<br>males: $n = 5$ ( $5.4 \pm 1.3$ )<br>females: $n = 8$ ( $4.6 \pm 1.1$ ) | $n = 15$ ( $5.8 \pm 1.1$ )<br>male: $n = 6$ ( $6 \pm 1$ )<br>females: $n = 9$ ( $5.6 \pm 1.2$ ) | 5 right hemiplegia<br>8 left hemiplegia<br>MACS level II = 2, III = 9, IV = 2 | Cross-sectional study | Reach-to-grasp object at different positions<br>Unilateral task assessed with each of the two hands, but results reported regardless of the hand used | Movement onset asynchrony (time-gap between first gaze toward the stimulus and hand initiation)         | Children with CP had a delay between gaze and movement initiation compared to TD children.                                                                                                                                                                          |

**Legend:**  $n$  = number of participants; MACS: Manual Ability Classification System; GMFCS: Gross Motor Function Classification System. The subtype CP terminology reflects the one reported in the articles.
